# Supplementary material for: The Cloud Feedback Model Intercomparison Project (CFMIP) contribution to CMIP6
Source: Copernicus journal article supplement (doi:10.5194/gmd-2016-70), 2016-05-12
Supplement: Supplementary file [file gmd-2016-70-AC1-supplement.pdf]

**Response to Interactive comment on by H. Shiogama on “The Cloud Feedback Model Intercomparison Project (CFMIP) contribution to CMIP6” by Mark J. Webb et al.**

Reviewer comments below are shown in bold and our responses are in italics.

*Dear Hideo,*

**This paper provides a clear description of the design of CFMIP3/CMIP6. The proposed experiments and outputs are interesting and will be important contributions to CMIP6. I have only a few minor comments.**

*Thank you for your careful consideration of our manuscript and for these helpful comments.*

**I assume that all the CFMIP experiments are CO<sub>2</sub> concentration driven. Should ESMs turn off dynamic vegetation and chemistry schemes?**

*The CFMIP experiments are indeed driven by CO<sub>2</sub> concentration rather than CO<sub>2</sub> emissions. Many of the CFMIP experiments are based on the DECK experiments (e.g. amip, piControl, abrupt-4xCO<sub>2</sub>). Experiments such as amip-p4K and abrupt-2xCO<sub>2</sub> should be configured consistently with the DECK experiments that they are based on.*

*We will add additional text in the 2<sup>nd</sup> line of Section 2 as follows:*

*“Most of the CFMIP-3 experiments are based on CO<sub>2</sub> concentration forced amip, piControl and abrupt-4xCO<sub>2</sub> CMIP DECK (Diagnostic, Evaluation and Characterization of Klima) experiments (Eyring et al., 2016). Unless otherwise specified below, the CFMIP-3 experiments should be configured consistently with the DECK experiments on which they are based, using consistent model formulation, and forcings and boundary conditions as specified by Eyring et al., 2016.”*

**Line 213 “Sea ice and SSTs under sea ice remain the same as in the amip DECK experiment.”: How should we set SSTs in grids with 50% concentration of sea ice?**

*We will modify this text as follows:*

*“Sea ice and SSTs in grid boxes containing sea ice remain the same as in the amip DECK experiment.”*

**Line 263 “As such we hope that these experiments will provide useful synergies with Palaeoclimate Model Intercomparison Project (PMIP)”: If there are any experiments that are directly related to the CFMIP experiments, please specify.**

*We will modify this text as follows:*

*“As such we hope that these experiments will provide useful synergies with the Palaeoclimate Model Intercomparison Project (PMIP) CMIP6 experiments (e.g. in interpreting differing cloud feedbacks*

*between future CO<sub>2</sub> forced experiments and those representing the Last Glacial Maximum, as highlighted by Yoshimori et al., 2009).*"

**Line 302 "cloud-radiative effects are switched off in the longwave part of the radiation code": Is the shortwave part retained?**

*We will modify this text as follows:*

*"cloud-radiative effects are switched off in the longwave part of the radiation code while retaining those in the shortwave."*

**2.4 Abrupt +/-4% solar forced runs: Not only TSI but also spectral solar irradiance (SSI) are provided for CMIP6 (<http://solarisheppa.geomar.de/cmip6>). I assume that many ESMs use the SSI data for their DECK experiments. How to add +/-4% solar forcing on SSI?**

*We will add a line to section 2.4 which states:*

*"When changing the solar constant, the shape of the spectral solar irradiance distribution should remain consistent with that in the piControl experiment."*

**Line 411 piSST: Do we use the monthly mean values of each year of piControl? Monthly mean climatology would lead to better S/N.**

*We will add the following to Section 2.7*

*"These are forced with monthly- and annually-varying monthly mean SSTs and sea ice, which reproduce regional precipitation patterns more accurately than is possible using climatological SST forcing."*

**Line 550 "allowing a detailed evaluation clouds": allowing a detailed evaluation of clouds?**

*We will correct that.*
